# Supplementary material for: Fabrication of ZnO homojunction-based color-switchable bidirectional LEDs by using a hydrothermal growth method
Source: Royal Society of Chemistry journal article supplement (doi:10.1039/c7tc02645e), 2017-01-01
Supplement: c7tc02645e1.pdf [file c7tc02645e1.pdf]

## **Supporting Information**

### **ZnO Homojunction-based Color-Switchable Bidirectional LEDs by Using Hydrothermal Growth Method**

**Sung-Doo Baek, Yoann Porte, Yun Cheol Kim, and Jae-Min Myoung\***

*Department of Materials Science and Engineering, Yonsei University, 50 Yonsei-ro, Seodaemun-gu,  
Seoul 120-749, Republic of Korea*

\*E-mail address: [jmmyoung@yonsei.ac.kr](mailto:jmmyoung@yonsei.ac.kr)

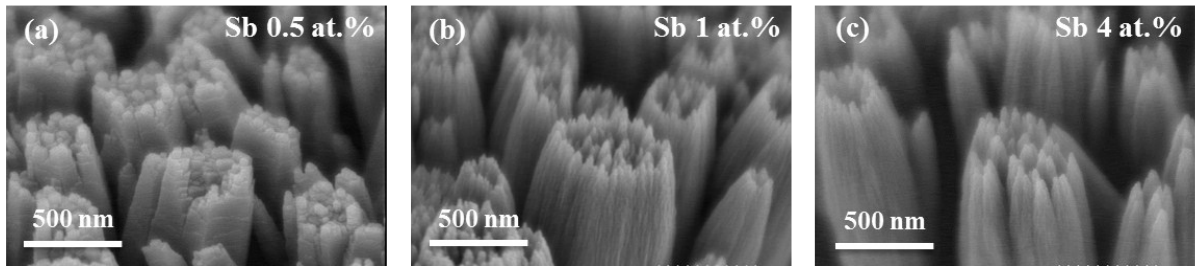

**Figure S1.** SEM images of p-type NRs doped with Sb concentration of (a) 0.5 at.%, (b) 1 at.%, and (c) 4 at.%.

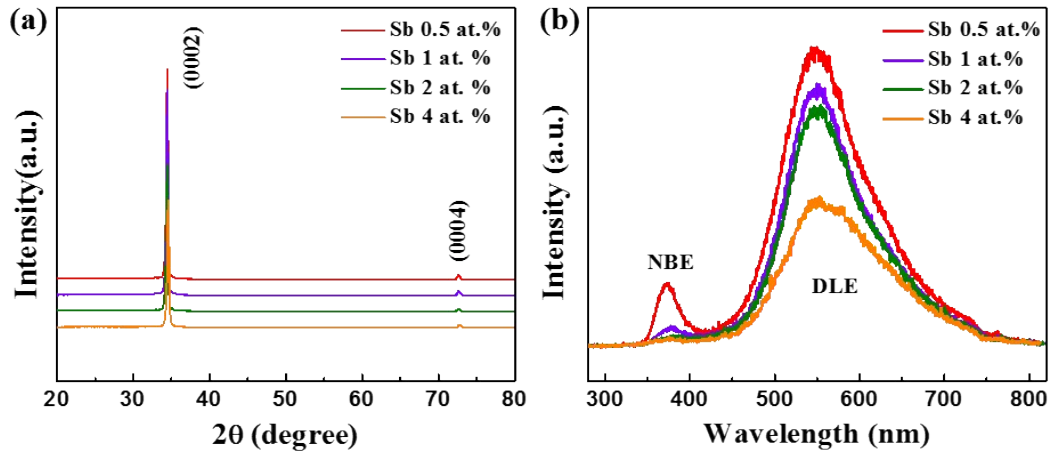

**Figure S2.** (a) XRD data of the Sb-doped p-type ZnO NRs. (b) Room-temperature PL data of the Sb-doped p-type ZnO NRs.

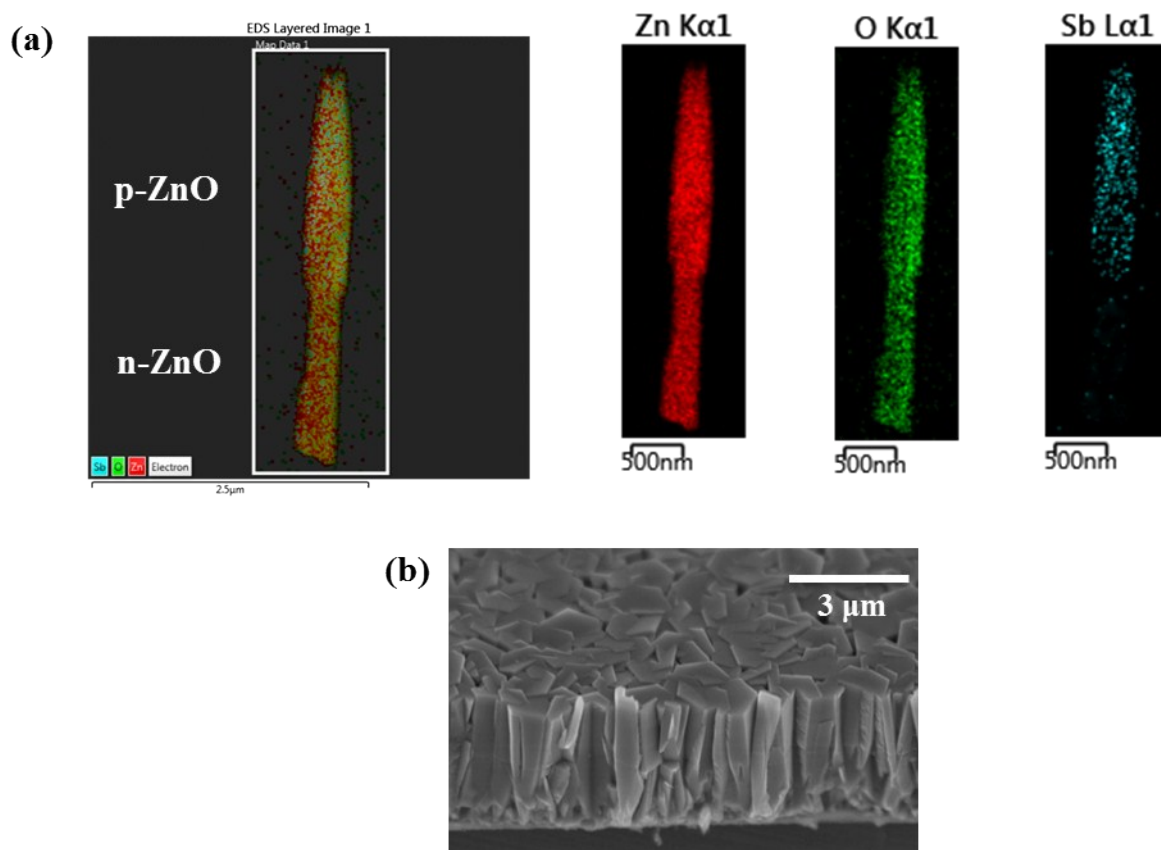

**Figure S3.** (a) EDS mapping images for Zn, O, and Sb elements. (b) 45° angled-view SEM image of film-type 2 at.% Sb-doped ZnO NRs.

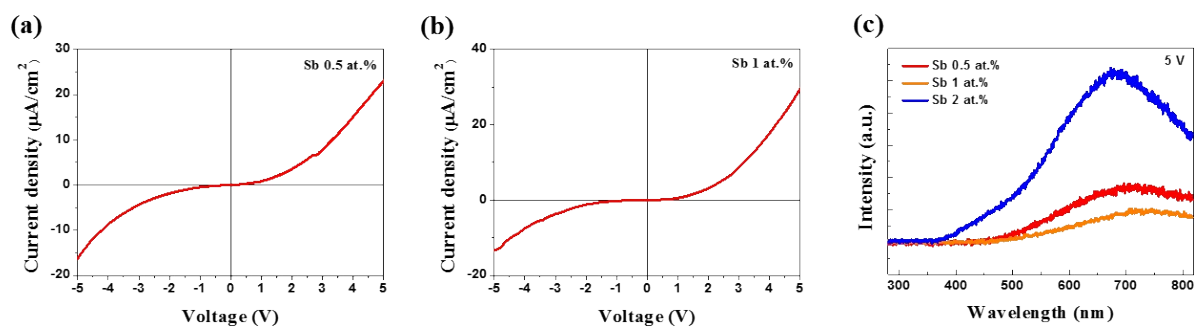

**Figure S4.** J-V characteristics of p-type NRs doped with Sb concentration of (a) 0.5 at.% and (b) 1 at.%. (c) EL characteristics of the devices fabricated with Sb-doped p-type NRs at a forward bias of 5 V.
